# Supplementary material for: Electron-induced deposition using Fe(CO)4MA and Fe(CO)5 – effect of MA ligand and process conditions
Source: publisher site journal article supplement (doi:10.3762/bjnano.15.45), 2024-05-08
Supplement: Additional file 1 [file 2190-4286-15-45-S1.pdf]

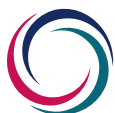

## Supporting Information

for

### **Electron-induced deposition using $\text{Fe}(\text{CO})_4\text{MA}$ and $\text{Fe}(\text{CO})_5$ – effect of MA ligand and process conditions**

Hannah Boeckers, Atul Chaudhary, Petra Martinović, Amy V. Walker, Lisa McElwee-White and Petra Swiderek

*Beilstein J. Nanotechnol.* **2024**, *15*, 500–516. [doi:10.3762/bjnano.15.45](https://doi.org/10.3762/bjnano.15.45)

## Additional figures and tables

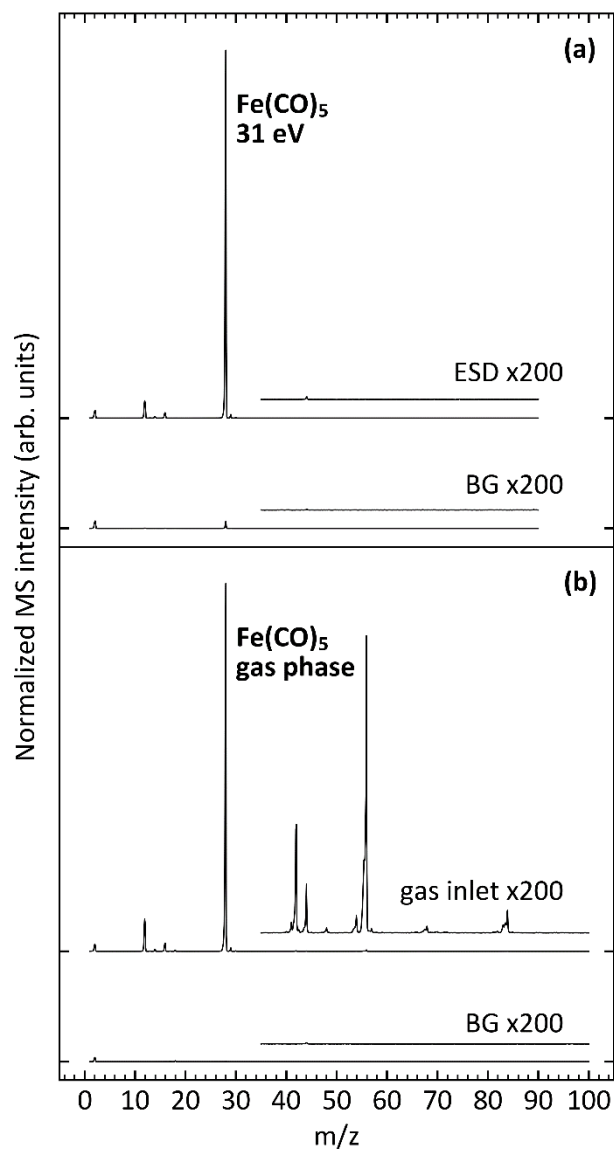

**Figure S1:** (a) ESD of neutral species during irradiation with 31 eV electrons from an Fe(CO)<sub>5</sub> multilayer on a Ta substrate held at 100 K (ESD). The thickness of the condensed layer was roughly 4 monolayers. (b) Mass spectra recorded during leaking of Fe(CO)<sub>5</sub> into the UHV chamber (gas inlet). Both data sets include a background mass spectrum (BG) recorded immediately prior to precursor leakage and electron irradiation, respectively. Ticks on the vertical axis indicate the baseline for each curve.

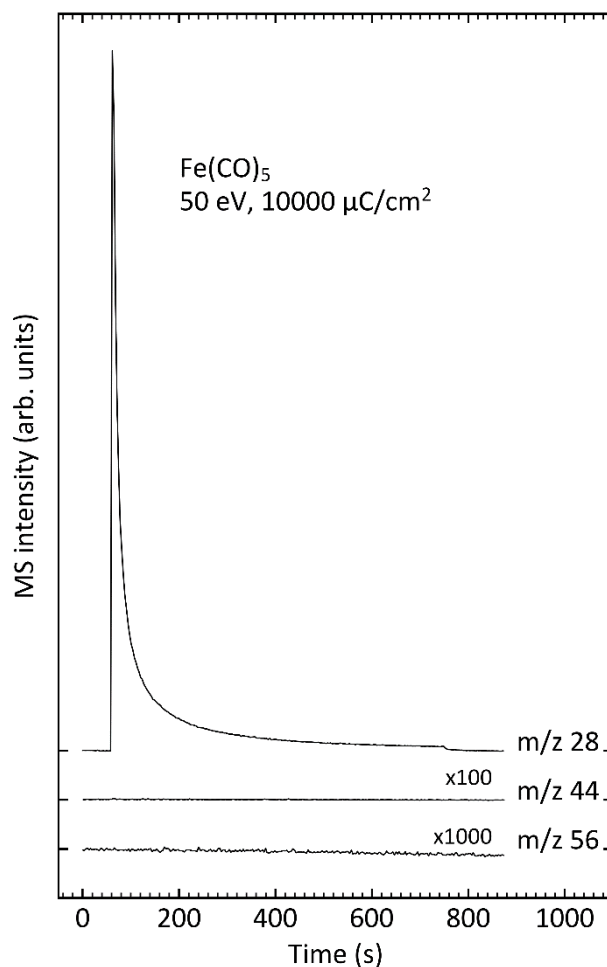

**Figure S2:** Time evolution of characteristic ESD signals recorded during irradiation with 50 eV electrons from an Fe(CO)<sub>5</sub> multilayer on a Ta substrate held at 100 K. The thickness of the condensed layer was roughly 5 monolayers. *m/z* 28 represents desorption of CO, *m/z* 56 was recorded to determine if Fe-containing species desorb. *m/z* 44 was monitored to search for desorption of CO<sub>2</sub>. The total electron exposure was 10000 μC/cm<sup>2</sup>. Ticks on the vertical axis indicate the baseline for each curve at the beginning of the experiment.

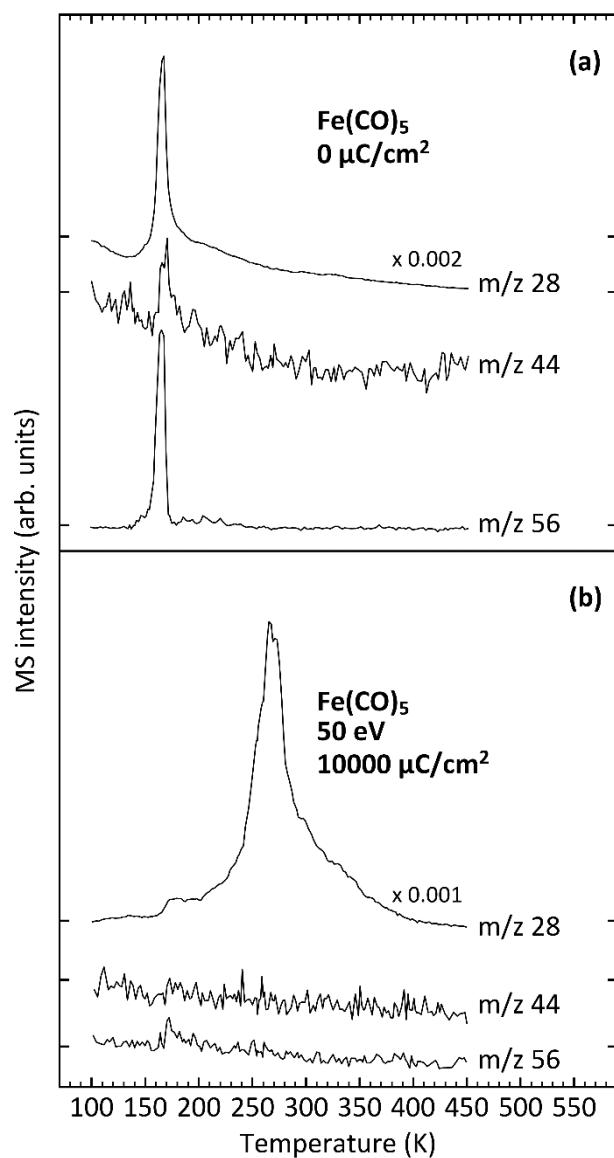

**Figure S3:** TDS obtained (a) from a pristine Fe(CO)<sub>5</sub> multilayer and (b) from an Fe(CO)<sub>5</sub> multilayer after irradiation with a total electron exposure of 10000 μC/cm<sup>2</sup> at 50 eV shown in Figure S2. The thickness of the condensed layers prepared on a Ta substrate held at 100 K was roughly 5 monolayers. Ticks on the vertical axis indicate the baseline for each curve at the beginning of the experiment. A slope in the baseline was due to pumping of residual precursor gas from the chamber.

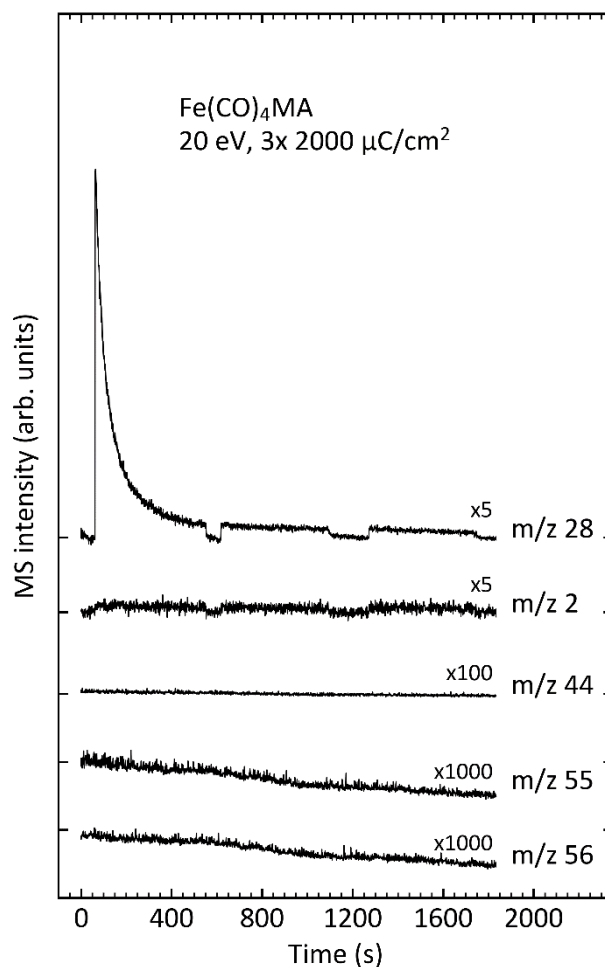

**Figure S4:** Time evolution of characteristic ESD signals from an Fe(CO)<sub>4</sub>MA multilayer on a Ta substrate held at 100 K, recorded during irradiation with 20 eV electrons. The thickness of the condensed layer was roughly 5 monolayers. *m/z* 28 represents desorption of CO, *m/z* 2 is H<sub>2</sub>, and *m/z* 55 and 56 were recorded to determine if Fe-containing species or the free ligand or fragments thereof desorb. *m/z* 44 was monitored to search for desorption of CO<sub>2</sub>. Irradiation was performed in three steps, each consisting of electron exposures of 2000 μC/cm<sup>2</sup>. Ticks on the vertical axis indicate the baseline for each curve at the beginning of the experiment. A slope in the baseline was due to pumping of residual precursor gas from the chamber.

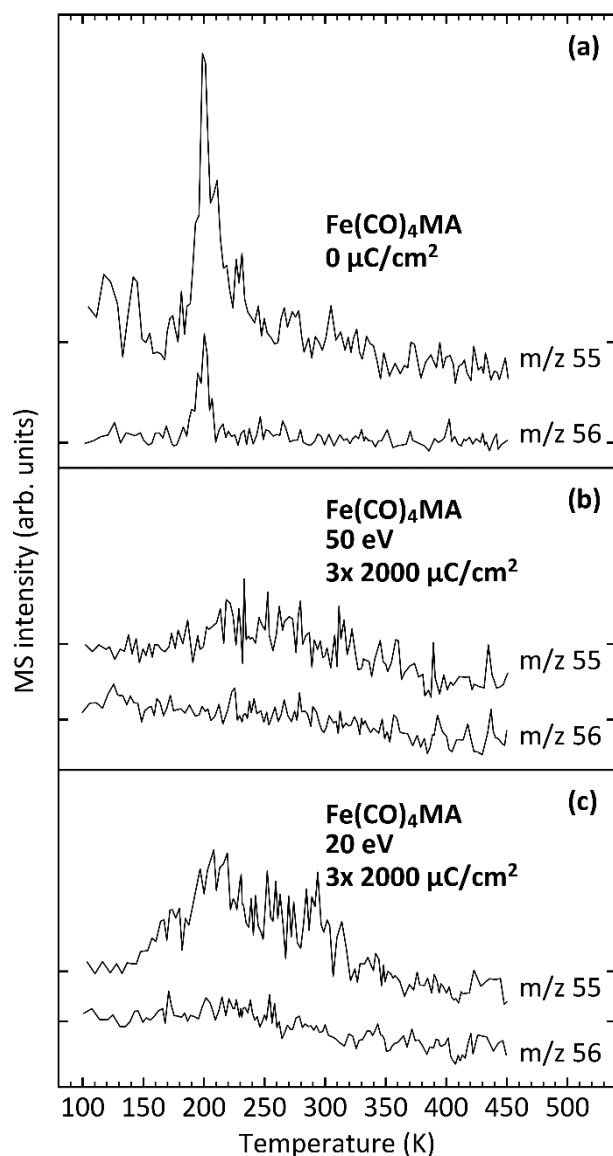

**Figure S5:** TDS obtained (a) from a pristine Fe(CO)<sub>4</sub>MA multilayer without electron irradiation (denoted as 0 μC/cm<sup>2</sup>) and (b) from Fe(CO)<sub>4</sub>MA multilayers after three irradiation steps with a total electron exposure of 6000 μC/cm<sup>2</sup> at 50 eV, and (c) after the same irradiation experiment but performed at 20 eV. The thickness of the condensed layers prepared on a Ta substrate held at 100 K was roughly 5 monolayers. Ticks on the vertical axis indicate the baseline for each curve at the beginning of the experiment. A slope in the baseline was due to pumping of residual precursor gas from the chamber.

**Table S1:** Summary of deposition experiments by thermal reactions (TDS), room temperature EBID, cryo-EBID, and autocatalytic growth (AG) using Fe(CO)<sub>5</sub>.

| Fe(CO) <sub>5</sub>                                                                                                                                                                                            | AES PtP heights |       |       |       | Thickness [nm] <sup>a</sup> | Fe : C : O (at%) <sup>b</sup> |
|----------------------------------------------------------------------------------------------------------------------------------------------------------------------------------------------------------------|-----------------|-------|-------|-------|-----------------------------|-------------------------------|
|                                                                                                                                                                                                                | Ta              | C     | O     | Fe    |                             |                               |
| TDS experiments (precursor condensed at 100 K followed by warm-up):<br>Sputtering / AES / 2x TDS (2.5 mTorr) / AES / 2x TDS (2.5 mTorr) / AES                                                                  |                 |       |       |       |                             |                               |
| TDS w/o precursor                                                                                                                                                                                              | 62372           | 4438  | 6969  | 0     |                             |                               |
|                                                                                                                                                                                                                | 62595           | 7225  | 19228 | 0     | 0 / 0 (1)                   | 0 : 1 : 1.2                   |
|                                                                                                                                                                                                                | 61545           | 8678  | 32633 | 0     | 0.01/0.01 (2)               | 0 : 1 : 1.6                   |
| TDS 1                                                                                                                                                                                                          | 55059           | 9181  | 11204 | 0     |                             |                               |
|                                                                                                                                                                                                                | 36478           | 25619 | 43528 | 5516  | 0.16/0.26 (2x)              | 1 : 8.9 : 6.6                 |
|                                                                                                                                                                                                                | 31384           | 28628 | 47306 | 7702  | 0.21/0.36 (4x)              | 1 : 7.2 : 5.1                 |
| TDS 2                                                                                                                                                                                                          | 55874           | 9978  | 10426 | 0     |                             |                               |
|                                                                                                                                                                                                                | 38256           | 27793 | 44674 | 5313  | 0.14/0.24 (2x)              | 1 : 10.1 : 7.0                |
|                                                                                                                                                                                                                | 32856           | 29579 | 46932 | 6828  | 0.20/0.34 (4x)              | 1 : 8.3 : 5.7                 |
| EBID experiment (precursor dosing at room temperature during electron irradiation):<br>Sputtering / AES / EBID (5 mTorr) / AES / EBID (5 mTorr) / AES                                                          |                 |       |       |       |                             |                               |
| EBID w/o precursor<br>50 eV                                                                                                                                                                                    | 62396           | 4049  | 6098  | 0     |                             |                               |
|                                                                                                                                                                                                                | 62684           | 10064 | 27564 | 0     | 0 / 0 (1)                   | 0 : 1 : 1.2                   |
|                                                                                                                                                                                                                | 56943           | 11873 | 45537 | 0     | 0.04/0.06 (2)               | 0 : 1 : 1.7                   |
| EBID 1, 50 eV                                                                                                                                                                                                  | 57483           | 8904  | 15985 | 0     |                             |                               |
|                                                                                                                                                                                                                | 37552           | 22304 | 54787 | 9628  | 0.16/0.27 (1)               | 1 : 4.5 : 4.7                 |
|                                                                                                                                                                                                                | 29259           | 20180 | 66745 | 20019 | 0.26/0.43 (2)               | 1 : 1.9 : 2.8                 |
| EBID 2, 50 eV                                                                                                                                                                                                  | 57567           | 8698  | 13721 | 0     |                             |                               |
|                                                                                                                                                                                                                | 36336           | 22804 | 55371 | 12694 | 0.17/0.29 (1)               | 1 : 3.5 : 3.6                 |
|                                                                                                                                                                                                                | 24071           | 18468 | 60976 | 24382 | 0.33/0.56 (2)               | 1 : 1.5 : 2.1                 |
| Cryo-EBID experiments (precursor condensed at 100 K, then electron irradiation and warm-up):<br>Sputtering / AES / cryo-EBID (5 mTorr) / AES / cryo-EBID (5 mTorr) / AES                                       |                 |       |       |       |                             |                               |
| Cryo-EBID 1, 50 eV                                                                                                                                                                                             | 57543           | 7865  | 10700 | 0     |                             |                               |
|                                                                                                                                                                                                                | 23787           | 24736 | 43934 | 28178 | 0.34/0.57 (1)               | 1 : 1.7 : 1.3                 |
|                                                                                                                                                                                                                | 13511           | 25533 | 42896 | 44919 | 0.55/0.93 (2)               | 1 : 1.1 : 0.8                 |
| Cryo-EBID 2, 50 eV                                                                                                                                                                                             | 56061           | 7609  | 10971 | 0     |                             |                               |
|                                                                                                                                                                                                                | 23060           | 23849 | 41354 | 28883 | 0.34/0.57 (1)               | 1 : 1.6 : 1.2                 |
|                                                                                                                                                                                                                | 13543           | 23055 | 42903 | 45878 | 0.54/0.91 (2)               | 1 : 1.0 : 0.8                 |
| Autocatalytic growth experiments (EBID seed deposit from Fe(CO) <sub>5</sub> , then thermal growth):<br>Sputtering / AES / EBID (5 mTorr Fe(CO) <sub>5</sub> ) / AES / AG (5 mTorr) / AES / AG (5 mTorr) / AES |                 |       |       |       |                             |                               |
| AG 1                                                                                                                                                                                                           | 65309           | 4714  | 6953  | 0     |                             |                               |
|                                                                                                                                                                                                                | 41283           | 29583 | 49171 | 12860 | 0.17/0.29 (EBID)            | 1 : 4.4 : 3.2                 |
|                                                                                                                                                                                                                | 31209           | 26257 | 56175 | 26249 | 0.28/0.47 (1)               | 1 : 1.9 : 1.8                 |
|                                                                                                                                                                                                                | 22389           | 22615 | 57624 | 40104 | 0.41/0.69 (2)               | 1 : 1.1 : 1.2                 |
| AG 2                                                                                                                                                                                                           | 66904           | 5003  | 6877  | 0     |                             |                               |
|                                                                                                                                                                                                                | 38819           | 27646 | 50353 | 13302 | 0.21/0.35 (EBID)            | 1 : 4.0 : 3.2                 |
|                                                                                                                                                                                                                | 29736           | 24833 | 54703 | 23929 | 0.31/0.52 (1)               | 1 : 2.0 : 1.9                 |
|                                                                                                                                                                                                                | 21583           | 21907 | 56148 | 35208 | 0.43/0.72 (2)               | 1 : 1.2 : 1.3                 |

<sup>a</sup> Thickness calculated from the attenuation of the Ta signal. Upper and lower values result from electron attenuation lengths of Ta<sub>NNN</sub> electrons in Fe (0.38 nm at 183 eV) as well as in C (0.64 nm at 183 eV) [1], respectively.

<sup>b</sup> Composition derived from peak-to-peak heights of the AES signals weighted by tabulated sensitivity factors at 5 keV for the elements Fe (0.9168 at 705 eV), C (0.4763 at 275 eV), and O (1.1012 at 510 eV) [2] assuming a homogeneous distribution of the elements within the deposit.

**Table S2:** Summary of deposition experiments by thermal reactions (TDS), room temperature EBID, cryo-EBID, and autocatalytic growth (AG) using Fe(CO)<sub>4</sub>MA.

| Fe(CO) <sub>4</sub> MA                                                                                                                                                                                         | AES PtP heights |       |       |       | Thickness [nm] <sup>a</sup> | Fe : C : O (at%) <sup>b</sup> |
|----------------------------------------------------------------------------------------------------------------------------------------------------------------------------------------------------------------|-----------------|-------|-------|-------|-----------------------------|-------------------------------|
|                                                                                                                                                                                                                | Ta              | C     | O     | Fe    |                             |                               |
| TDS experiments (precursor condensed at 100 K followed by warm-up):<br>Sputtering / AES / 2x TDS (2.5 mTorr) / AES / 2x TDS (2.5 mTorr) / AES                                                                  |                 |       |       |       |                             |                               |
| TDS w/o precursor                                                                                                                                                                                              | 62372           | 4438  | 6969  | 0     |                             |                               |
|                                                                                                                                                                                                                | 62595           | 7225  | 19228 | 0     | 0 / 0 (1)                   | 0 : 1 : 1.2                   |
|                                                                                                                                                                                                                | 61545           | 8678  | 32633 | 0     | 0.01/0.01 (2)               | 0 : 1 : 1.6                   |
| TDS 1                                                                                                                                                                                                          | 57035           | 7017  | 12060 | 0     |                             |                               |
|                                                                                                                                                                                                                | 35532           | 27409 | 46533 | 5650  | 0.18/0.30 (2x)              | 1 : 9.3 : 6.9                 |
|                                                                                                                                                                                                                | 28704           | 29780 | 49356 | 5998  | 0.26/0.44 (4x)              | 1 : 9.5 : 6.9                 |
| TDS 2                                                                                                                                                                                                          | 55494           | 8934  | 11226 | 0     |                             |                               |
|                                                                                                                                                                                                                | 33760           | 28382 | 41311 | 5134  | 0.19/0.32 (2x)              | 1 : 10.6 : 6.7                |
|                                                                                                                                                                                                                | 29460           | 30940 | 46577 | 7115  | 0.24/0.41 (4x)              | 1 : 8.4 : 5.5                 |
| EBID experiment (precursor dosing at room temperature during electron irradiation):<br>Sputtering / AES / EBID (5 mTorr) / AES / EBID (5 mTorr) / AES /                                                        |                 |       |       |       |                             |                               |
| EBID w/o precursor<br>50 eV                                                                                                                                                                                    | 62396           | 4049  | 6098  | 0     |                             |                               |
|                                                                                                                                                                                                                | 62684           | 10064 | 27564 | 0     | 0.00/0.00 (1)               | 0 : 1 : 1.2                   |
|                                                                                                                                                                                                                | 56943           | 11873 | 45537 | 0     | 0.04/0.06 (2)               | 0 : 1 : 1.7                   |
| EBID 1, 50 eV                                                                                                                                                                                                  | 57299           | 15401 | 21606 | 0     |                             |                               |
|                                                                                                                                                                                                                | 32783           | 28900 | 57368 | 11517 | 0.21/0.36 (1)               | 1 : 4.7 : 3.7                 |
|                                                                                                                                                                                                                | 18405           | 29867 | 65725 | 23188 | 0.43/0.73 (2)               | 1 : 2.5 : 2.4                 |
| EBID 2, 50 eV                                                                                                                                                                                                  | 57543           | 9569  | 16819 | 0     |                             |                               |
|                                                                                                                                                                                                                | 30679           | 29458 | 53790 | 12021 | 0.24/0.40 (1)               | 1 : 4.8 : 4.1                 |
|                                                                                                                                                                                                                | 15802           | 29511 | 68985 | 24785 | 0.49/0.83 (2)               | 1 : 2.3 : 2.3                 |
| EBID 1, 100 eV                                                                                                                                                                                                 | 59037           | 6984  | 13706 | 0     |                             |                               |
|                                                                                                                                                                                                                | 26394           | 30956 | 51263 | 15949 | 0.31/0.51 (1)               | 1 : 3.7 : 2.7                 |
|                                                                                                                                                                                                                | 12250           | 31999 | 51421 | 34499 | 0.60/1.00 (2)               | 1 : 1.8 : 1.2                 |
| EBID 2, 100 eV                                                                                                                                                                                                 | 53708           | 7202  | 8644  | 0     |                             |                               |
|                                                                                                                                                                                                                | 23174           | 30853 | 43860 | 18021 | 0.32/0.54 (1)               | 1 : 3.3 : 2.0                 |
|                                                                                                                                                                                                                | 12211           | 30763 | 42828 | 31398 | 0.56/0.95 (2)               | 1 : 1.9 : 1.1                 |
| Cryo-EBID experiments (precursor condensed at 100 K, then electron irradiation and warm-up):<br>Sputtering / AES / cryo-EBID (5 mTorr) / AES / cryo-EBID (5 mTorr) / AES                                       |                 |       |       |       |                             |                               |
| Cryo-EBID 1, 50 eV                                                                                                                                                                                             | 55504           | 6975  | 10461 | 0     |                             |                               |
|                                                                                                                                                                                                                | 8266            | 27479 | 45190 | 19930 | 0.72/1.22 (1)               | 1 : 2.7 : 1.9                 |
|                                                                                                                                                                                                                | 2697            | 28042 | 44556 | 23647 | 1.15/1.94 (2)               | 1 : 2.3 : 1.6                 |
| Cryo-EBID 2, 50 eV                                                                                                                                                                                             | 54222           | 6949  | 9343  | 0     |                             |                               |
|                                                                                                                                                                                                                | 6792            | 27112 | 43469 | 19126 | 0.79/1.33 (1)               | 1 : 2.7 : 1.9                 |
|                                                                                                                                                                                                                | 2827            | 29151 | 46850 | 24854 | 1.12/1.90 (2)               | 1 : 2.3 : 1.6                 |
| Autocatalytic growth experiments (EBID seed deposit from Fe(CO) <sub>5</sub> , then thermal growth):<br>Sputtering / AES / EBID (5 mTorr Fe(CO) <sub>5</sub> ) / AES / AG (5 mTorr) / AES / AG (5 mTorr) / AES |                 |       |       |       |                             |                               |
| AG 1                                                                                                                                                                                                           | 55154           | 5525  | 8412  | 0     |                             |                               |
|                                                                                                                                                                                                                | 34316           | 24225 | 45809 | 11581 | 0.18/0.30 (EBID)            | 1 : 4.0 : 3.3                 |
|                                                                                                                                                                                                                | 27555           | 26168 | 48466 | 13479 | 0.26/0.44 (1)               | 1 : 3.7 : 3.0                 |
|                                                                                                                                                                                                                | 23593           | 28045 | 52627 | 15689 | 0.32/0.54 (2)               | 1 : 1.8 : 2.8                 |
| AG 2                                                                                                                                                                                                           | 55527           | 5486  | 6489  | 0     |                             |                               |
|                                                                                                                                                                                                                | 34241           | 24407 | 44110 | 11555 | 0.18/0.31 (EBID)            | 1 : 4.0 : 3.2                 |
|                                                                                                                                                                                                                | 33530           | 34105 | 57444 | 17238 | 0.19/0.32 (1)               | 1 : 3.8 : 2.8                 |
|                                                                                                                                                                                                                | 27608           | 34600 | 58881 | 20967 | 0.27/0.45 (2)               | 1 : 1.7 : 2.8                 |



<sup>a</sup> Thickness calculated from the attenuation of the Ta signal. Upper and lower values result from electron attenuation lengths of Ta<sub>NNN</sub> electrons in Fe (0.38 nm at 183 eV) as well as in C (0.64 nm at 183 eV) [1], respectively.

<sup>b</sup> Composition derived from peak-to-peak heights of the AES signals weighted by tabulated sensitivity factors at 5 keV for the elements Fe (0.9168 at 705 eV), C (0.4763 at 275 eV), and O (1.1012 at 510 eV) [2] assuming a homogeneous distribution of the elements within the deposit.

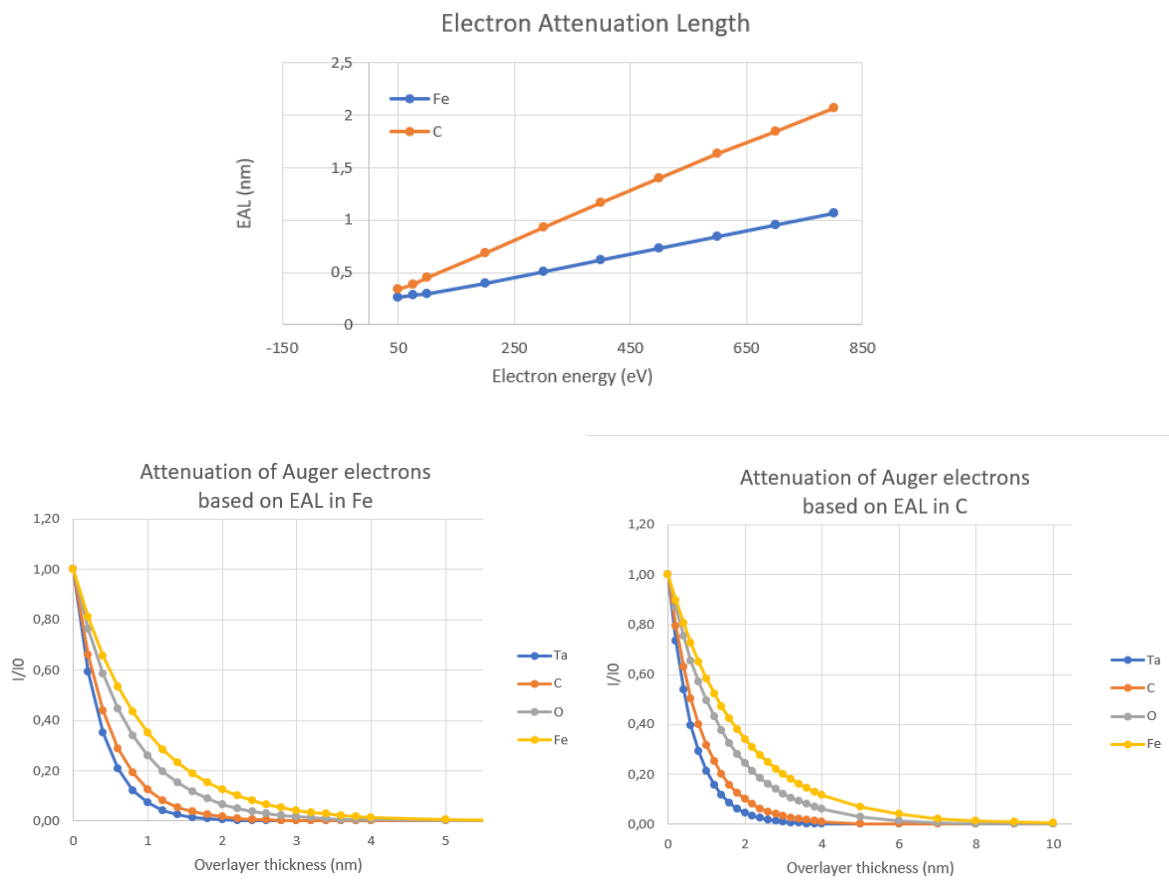

**Figure S6:** (Top) Electron attenuation length as function of electron energy in pure Fe and C, respectively [1]. These values are used to obtain a lower and upper limit of the deposit thickness from the attenuation of the Ta<sub>NNN</sub> AES signal as summarized in Tables S1 and S2. (Bottom) Attenuation of Ta<sub>NNN</sub>, C<sub>KLL</sub>, O<sub>KLL</sub>, and Fe<sub>LMM</sub> AES signal intensities originating from below an overlayer with varying thickness and consisting of pure Fe (left) and C (right), respectively. The intensities were obtained as  $I = I_0 \cdot e^{-d/EAL}$  with overlayer thickness  $d$  and electron attenuation length  $EAL$  for Fe and C, respectively.

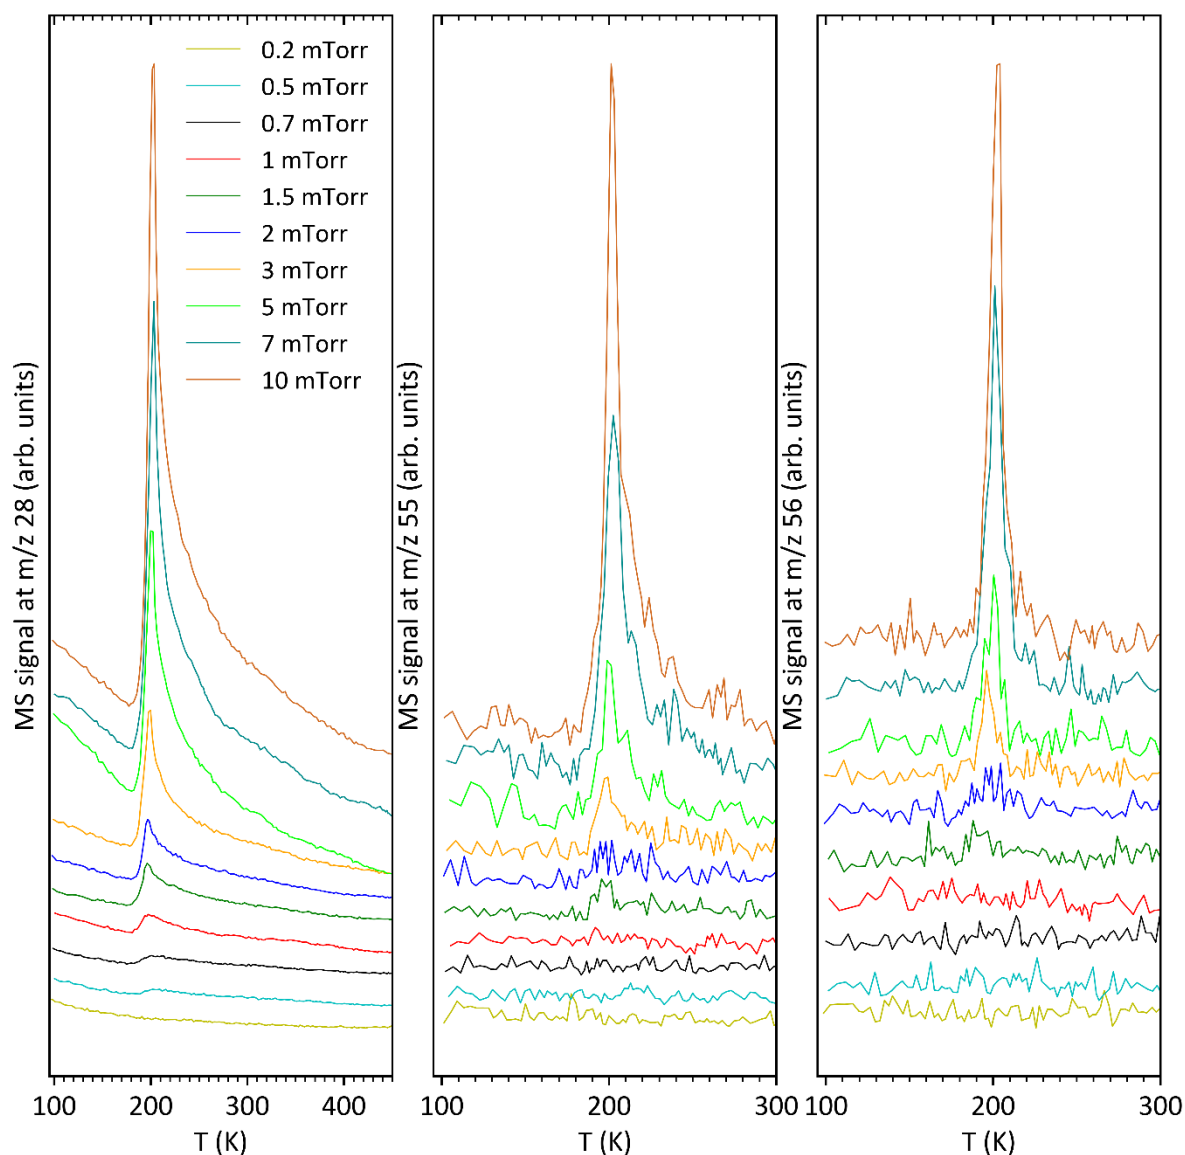

**Figure S7:** TDS curves obtained for  $m/z$  28 (left),  $m/z$  55 (middle), and  $m/z$  56 (right) after leaking varying amounts of  $\text{Fe}(\text{CO})_4\text{MA}$  onto the Ta substrate. The gas dose is defined as the pressure drop in the gas handling manifold in units of mTorr. A desorption signal in the  $m/z$  28 TDS curves ( $\text{CO}^{+\bullet}$ ) already appears well below a gas dose of 1 mTorr and develops into a sharp peak near 200 K above that dose. In contrast, signals in the  $m/z$  55 and 56 curves ( $\text{CH}_2\text{CHCO}^{+\bullet}$ , the dominant fragment of MA, and  $\text{Fe}^+$ , respectively), indicative of desorption of  $\text{Fe}(\text{CO})_4\text{MA}$ , start to emerge only above 1 mTorr. The slope of the baseline that is most noticeable in the  $m/z$  28 TDS curves is due to pumping of residual gas in the UHV chamber after leaking of the precursor.

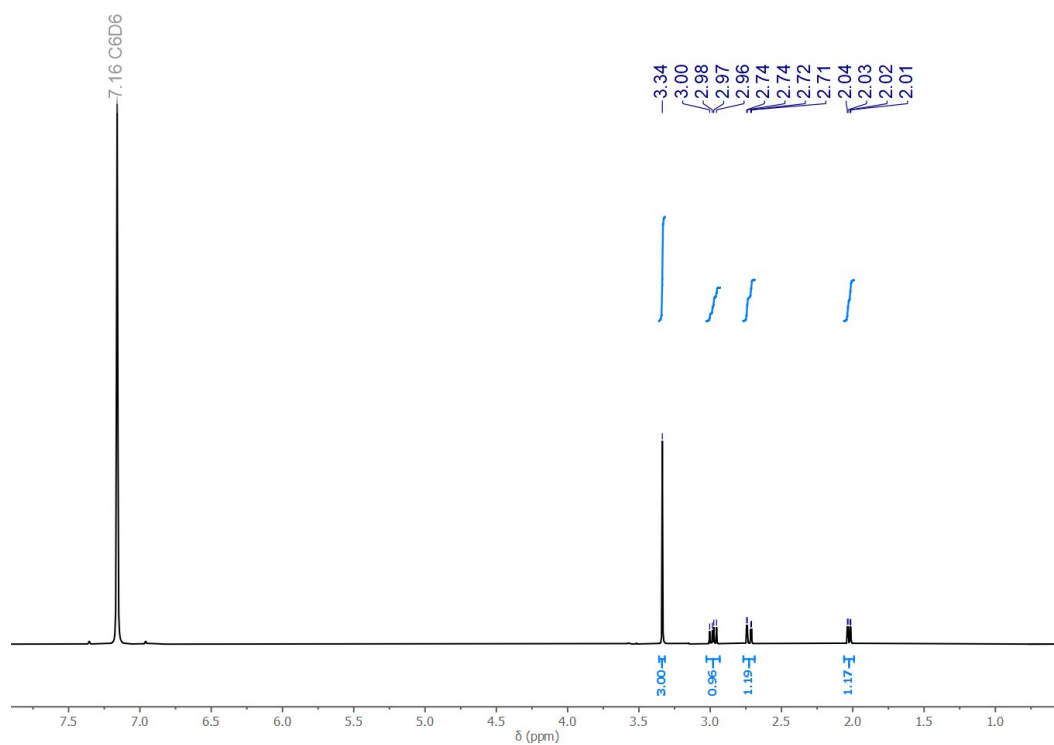

**Figure S8:**  $^1\text{H}$  NMR (400 MHz, 25 °C,  $\text{C}_6\text{D}_6$ ) spectrum of  $\text{Fe}(\text{CO})_4\text{MA}$  (MA = methyl acrylate,  $\text{H}_2\text{C}=\text{CH}-\text{COOCH}_3$ ):  $\delta$  3.34 (s, 3H), 2.98 (dd,  $J = 11.6, 7.8$  Hz, 1H), 2.73 (dd,  $J = 11.6, 2.3$  Hz, 1H), 2.03 (dd,  $J = 7.7, 2.3$  Hz, 1H).

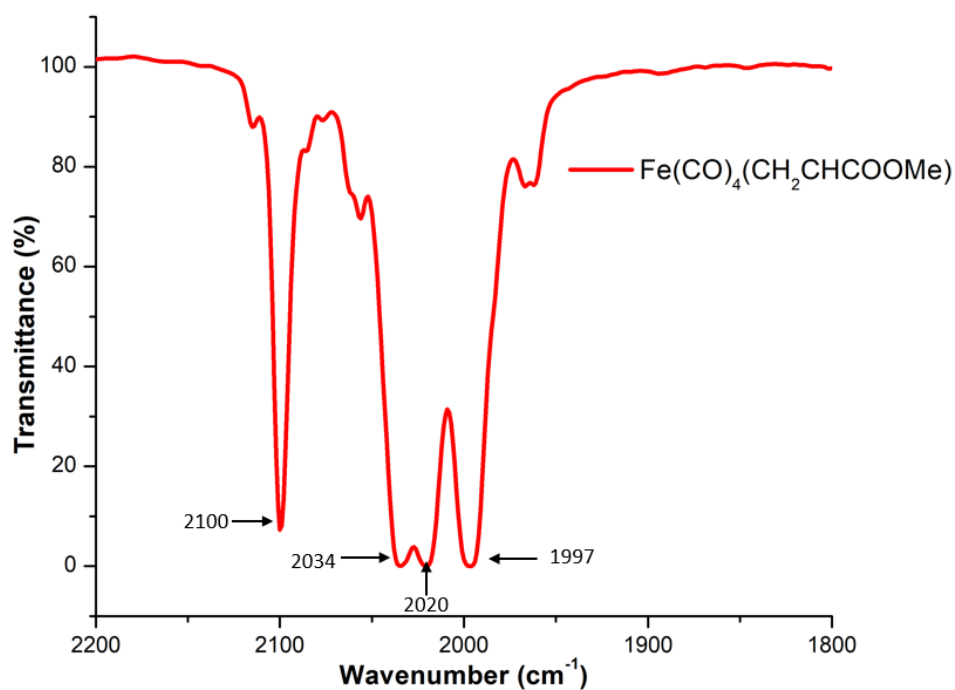

**Figure S9:** FT-IR spectrum of  $\text{Fe}(\text{CO})_4\text{MA}$  (MA = methyl acrylate,  $\text{H}_2\text{C}=\text{CH}-\text{COOCH}_3$ ) obtained in hexane solution:  $\nu_{\text{CO}}$  ( $\text{cm}^{-1}$ ): 2100, 2034, 2020, 1997.

## References

[1] P. J. Cumpson and M. P. Seah, *Surf. Interface Anal.* **25**, 430 (1997).

[2] D. Briggs and J. T. Grant (eds), *Surface analysis by Auger and X-ray photoelectron spectroscopy* (IM Publications, Chichester, UK and Surface Spectra, Manchester, UK, 2003).
